Development 134, 1453 (2007) doi:10.1242/dev.02839

**Cholangiocyte marker-positive and -negative fetal liver cells differ significantly in their ability to regenerate the livers of adult rats exposed to retrorsine**

**Rhonda Simper-Ronan, Kate Brilliant, Donna Flanagan, Marie Carreiro, Helen Callanan, Edmond Sabo and Douglas C. Hixson**

There was an error published in *Development* **133**, 4269-4279.

The Acknowledgements should have read 'Sponsored by grants CA42715, CA93840 and P20RR017695'.

The authors apologise to readers for this mistake.
